# Supplementary material for: A Randomized Trial of Dialectical Behavior Therapy Versus General Psychiatric Management for Borderline Personality Disorder
Source: Atypon-hosted journal article supplement (doi:10.1176/appi.ajp.2009.09010039), 2009-09-15
Supplement: appi.ajp.2009.09010039_suptbl2_mcmain.pdf [file appi.ajp.2009.09010039_suptbl2_mcmain.pdf]

REVISED TABLE 2. Confidence Intervals for the Odds Ratio of Improvement with Dialectical Behavior Therapy versus General Psychiatric Management

| Outcome Measure                                                                           | Treatment Assignment                |       |                                       |       | Time Effect              |                |         | Analyses <sup>a</sup>    |               |      | Effect Size <sup>d</sup> |
|-------------------------------------------------------------------------------------------|-------------------------------------|-------|---------------------------------------|-------|--------------------------|----------------|---------|--------------------------|---------------|------|--------------------------|
|                                                                                           | Dialectical Behavior Therapy (N=90) |       | General Psychiatric Management (N=90) |       | Odds Ratio <sup>b</sup>  | 95% CI         | p       | Odds Ratio <sup>b</sup>  | 95% CI        | p    |                          |
|                                                                                           | Mean                                | SD    | Mean                                  | SD    |                          |                |         |                          |               |      |                          |
| <b>Non-normally distributed count outcomes</b>                                            |                                     |       |                                       |       |                          |                |         |                          |               |      |                          |
| Suicidal and self-injurious episodes                                                      |                                     |       |                                       |       | 0.40                     | -1.31 to -0.54 | <0.0001 | 0.90                     | -0.66 to 0.45 | 0.72 |                          |
| Baseline                                                                                  | 21.43                               | 33.35 | 32.19                                 | 81.94 |                          |                |         |                          |               |      |                          |
| 4 months                                                                                  | 10.60                               | 20.96 | 14.02                                 | 43.87 |                          |                |         |                          |               |      |                          |
| 8 months                                                                                  | 8.95                                | 19.06 | 11.44                                 | 37.59 |                          |                |         |                          |               |      |                          |
| 12 months                                                                                 | 4.30                                | 9.32  | 12.87                                 | 51.45 |                          |                |         |                          |               |      |                          |
| Emergency department visits                                                               |                                     |       |                                       |       | 0.43                     | -1.23 to -0.44 | <0.0001 | 1.19                     | -0.43 to 0.78 | 0.57 |                          |
| Baseline                                                                                  | 1.99                                | 3.01  | 2.08                                  | 3.53  |                          |                |         |                          |               |      |                          |
| 4 months                                                                                  | 1.42                                | 3.44  | 0.92                                  | 1.21  |                          |                |         |                          |               |      |                          |
| 8 months                                                                                  | 0.71                                | 1.26  | 0.82                                  | 1.43  |                          |                |         |                          |               |      |                          |
| 12 months                                                                                 | 0.93                                | 1.45  | 1.00                                  | 2.20  |                          |                |         |                          |               |      |                          |
| Emergency department visits for suicidal behavior                                         |                                     |       |                                       |       | 0.35                     | -1.56 to -0.54 | <0.0001 | 1.35                     | -0.50 to 1.10 | 0.46 |                          |
| Baseline                                                                                  | 1.01                                | 1.47  | 0.77                                  | 1.65  |                          |                |         |                          |               |      |                          |
| 4 months                                                                                  | 0.74                                | 2.89  | 0.30                                  | 0.71  |                          |                |         |                          |               |      |                          |
| 8 months                                                                                  | 0.29                                | 0.67  | 0.23                                  | 0.59  |                          |                |         |                          |               |      |                          |
| 12 months                                                                                 | 0.41                                | 1.00  | 0.29                                  | 1.13  |                          |                |         |                          |               |      |                          |
| Days in psychiatric hospital                                                              |                                     |       |                                       |       | 0.22                     | -2.29 to -0.70 | 0.0002  | 1.13                     | -0.97 to 1.21 | 0.83 |                          |
| Baseline                                                                                  | 10.52                               | 24.42 | 8.90                                  | 25.16 |                          |                |         |                          |               |      |                          |
| 4 months                                                                                  | 2.32                                | 11.92 | 1.90                                  | 9.32  |                          |                |         |                          |               |      |                          |
| 8 months                                                                                  | 1.91                                | 8.57  | 2.09                                  | 8.26  |                          |                |         |                          |               |      |                          |
| 12 months                                                                                 | 3.73                                | 14.90 | 2.23                                  | 6.56  |                          |                |         |                          |               |      |                          |
|                                                                                           | Mean                                | SD    | Mean                                  | SD    | Coefficient <sup>c</sup> | 95% CI         | p       | Coefficient <sup>c</sup> | 95% CI        | p    |                          |
| <b>Normally distributed outcomes</b>                                                      |                                     |       |                                       |       |                          |                |         |                          |               |      |                          |
| Maximum medical risk of suicide and self-injurious episodes <sup>e</sup>                  |                                     |       |                                       |       | -0.20                    | -0.26 to -0.14 | <0.0001 | -0.02                    | -0.11 to 0.07 | 0.67 | 0.89                     |
| Baseline                                                                                  | 4.26                                | 2.87  | 3.67                                  | 2.64  |                          |                |         |                          |               |      |                          |
| 4 months                                                                                  | 2.46                                | 2.43  | 2.22                                  | 2.55  |                          |                |         |                          |               |      |                          |
| 8 months                                                                                  | 1.74                                | 2.42  | 1.56                                  | 2.41  |                          |                |         |                          |               |      |                          |
| 12 months                                                                                 | 1.73                                | 2.36  | 1.32                                  | 2.03  |                          |                |         |                          |               |      |                          |
| Symptom severity (Zanarini Rating Scale for Borderline Personality Disorder, total score) |                                     |       |                                       |       | -0.53                    | -0.66 to -0.40 | <0.0001 | -0.09                    | -0.28 to 0.09 | 0.33 | 1.13                     |
| Baseline                                                                                  | 15.49                               | 6.14  | 14.94                                 | 6.59  |                          |                |         |                          |               |      |                          |
| 4 months                                                                                  | 10.50                               | 5.98  | 9.86                                  | 5.29  |                          |                |         |                          |               |      |                          |
| 8 months                                                                                  | 8.57                                | 6.20  | 9.36                                  | 5.83  |                          |                |         |                          |               |      |                          |
| 12 months                                                                                 | 7.93                                | 6.11  | 8.16                                  | 5.79  |                          |                |         |                          |               |      |                          |
| Depression (Beck Depression Inventory)                                                    |                                     |       |                                       |       | -0.82                    | -1.11 to -0.53 | <0.0001 | -0.32                    | -0.74 to 0.11 | 0.14 | 1.07                     |
| Baseline                                                                                  | 37.15                               | 12.46 | 35.40                                 | 10.60 |                          |                |         |                          |               |      |                          |
| 4 months                                                                                  | 29.00                               | 14.59 | 28.43                                 | 14.04 |                          |                |         |                          |               |      |                          |
| 8 months                                                                                  | 24.30                               | 15.29 | 27.58                                 | 15.28 |                          |                |         |                          |               |      |                          |
| 12 months                                                                                 | 22.48                               | 16.20 | 25.19                                 | 15.05 |                          |                |         |                          |               |      |                          |
| Anger (State-Trait Anger Expression Inventory, anger expression-out subscore)             |                                     |       |                                       |       | -0.12                    | -0.20 to -0.04 | 0.002   | -0.03                    | -0.14 to 0.08 | 0.59 | 0.33                     |
| Baseline                                                                                  | 17.92                               | 5.19  | 17.60                                 | 5.51  |                          |                |         |                          |               |      |                          |
| 4 months                                                                                  | 16.47                               | 5.68  | 17.18                                 | 6.04  |                          |                |         |                          |               |      |                          |
| 8 months                                                                                  | 15.81                               | 4.76  | 16.32                                 | 5.44  |                          |                |         |                          |               |      |                          |
| 12 months                                                                                 | 16.05                               | 5.49  | 15.90                                 | 5.10  |                          |                |         |                          |               |      |                          |
| Health-related quality of life (EQ-5D)                                                    |                                     |       |                                       |       | 0.29                     | -0.09 to 0.67  | 0.14    | 0.17                     | -0.38 to 0.73 | 0.54 | 0.24                     |
| Baseline                                                                                  | 57.19                               | 21.93 | 55.29                                 | 19.41 |                          |                |         |                          |               |      |                          |
| 4 months                                                                                  | 58.63                               | 20.39 | 59.71                                 | 21.08 |                          |                |         |                          |               |      |                          |
| 8 months                                                                                  | 64.00                               | 19.07 | 58.24                                 | 22.03 |                          |                |         |                          |               |      |                          |
| 12 months                                                                                 | 63.45                               | 20.53 | 59.23                                 | 21.89 |                          |                |         |                          |               |      |                          |
| Symptom distress (Symptom Checklist-90-Revised, total score)                              |                                     |       |                                       |       | -0.04                    | -0.06 to -0.03 | <0.0001 | -0.002                   | -0.02 to 0.02 | 0.83 | 0.68                     |
| Baseline                                                                                  | 1.91                                | 0.77  | 1.85                                  | 0.76  |                          |                |         |                          |               |      |                          |
| 4 months                                                                                  | 1.66                                | 0.79  | 1.64                                  | 0.84  |                          |                |         |                          |               |      |                          |
| 8 months                                                                                  | 1.41                                | 0.86  | 1.49                                  | 0.83  |                          |                |         |                          |               |      |                          |
| 12 months                                                                                 | 1.35                                | 0.89  | 1.37                                  | 0.82  |                          |                |         |                          |               |      |                          |
| Interpersonal functioning (Inventory of Interpersonal Problems-64, total score)           |                                     |       |                                       |       | -1.68                    | -2.51 to -0.85 | <0.0001 | 0.21                     | -0.99 to 1.40 | 0.73 | 0.45                     |
| Baseline                                                                                  | 119.00                              | 44.02 | 121.30                                | 37.13 |                          |                |         |                          |               |      |                          |
| 4 months                                                                                  | 110.14                              | 40.79 | 114.58                                | 39.02 |                          |                |         |                          |               |      |                          |
| 8 months                                                                                  | 108.62                              | 43.79 | 106.48                                | 42.13 |                          |                |         |                          |               |      |                          |
| 12 months                                                                                 | 100.85                              | 50.52 | 102.99                                | 45.61 |                          |                |         |                          |               |      |                          |

<sup>a</sup> For non-normally distributed outcomes, time effect coefficients were based on generalized-estimating equation analyses estimating step reduction between baseline and follow-up time points, and group effect coefficients were based on generalized-estimating equation analyses estimating differences by treatment group at follow-up visits. For normally distributed outcomes, time effect coefficients were based on mixed-effects linear-regression estimates of slope, and group effect coefficients were based on mixed-effects linear-regression estimates of difference in slope by treatment group.

<sup>b</sup> The odds ratio was calculated by using the parameter estimate of the general-estimating-equation model. As this was a logarithmic model, the exponential of this estimate is reported.

<sup>c</sup> The coefficient was calculated based on mixed-effects linear regression analyses and represents estimates of difference in slope.

<sup>d</sup> Effect size represents effect over time for the total group. Effect sizes (Pearson point-biserial correlations) were computed on normally distributed outcomes and are based on the total sample's mean improvement divided by the pooled standard deviation at baseline. All effect sizes are reported in a positive direction. Effect size was interpreted as 0.10=small; 0.30=medium; and 0.50=large.

<sup>e</sup> The medical risk is calculated using lethality of method and treatment received for each suicidal and self-injurious episode; the maximum score is the highest score across episodes within a specific assessment period.
